# Supplementary material for: Heterologous expression of Ceratophyllum demersum phytochelatin synthase, CdPCS1, in rice leads to lower arsenic accumulation in grain
Source: PubMed Central journal article supplement — Sci Rep. 2014 Jul 22;4:5784. doi: 10.1038/srep05784 (PMC4105706; doi:10.1038/srep05784), 2014-07-22
Supplement: srep05784-s1.pdf [file srep05784-s1.pdf]

# **Heterologous expression of *Ceratophyllum demersum* phytochelatin synthase, *CdPCS1*, in rice leads to lower arsenic accumulation in grain**

**Manju Shri<sup>ab</sup>, Richa Dave<sup>a</sup>, Sanjay Diwedi<sup>a</sup>, Devesh Shukla<sup>a</sup>, Ravi Kesari<sup>a</sup>, Rudra Deo Tripathi<sup>ab</sup>, Prabodh Kumar Trivedi<sup>ab</sup>, Debasis Chakrabarty<sup>ab\*</sup>**

<sup>a</sup>Council of Scientific and Industrial Research - National Botanical Research Institute (CSIR-NBRI), Rana Pratap Marg, Lucknow-226001, INDIA

**Tel:** +91-522-2297923

**Fax:** 91-522-2205836, 2205839

<sup>b</sup>Academy of Scientific and Innovative Research (AcSIR), Anusandhan Bhawan, 2 Rafi Marg, New Delhi-110 001, India

\*Corresponding author

**e-mail:** chakrabartyd@nbri.res.in

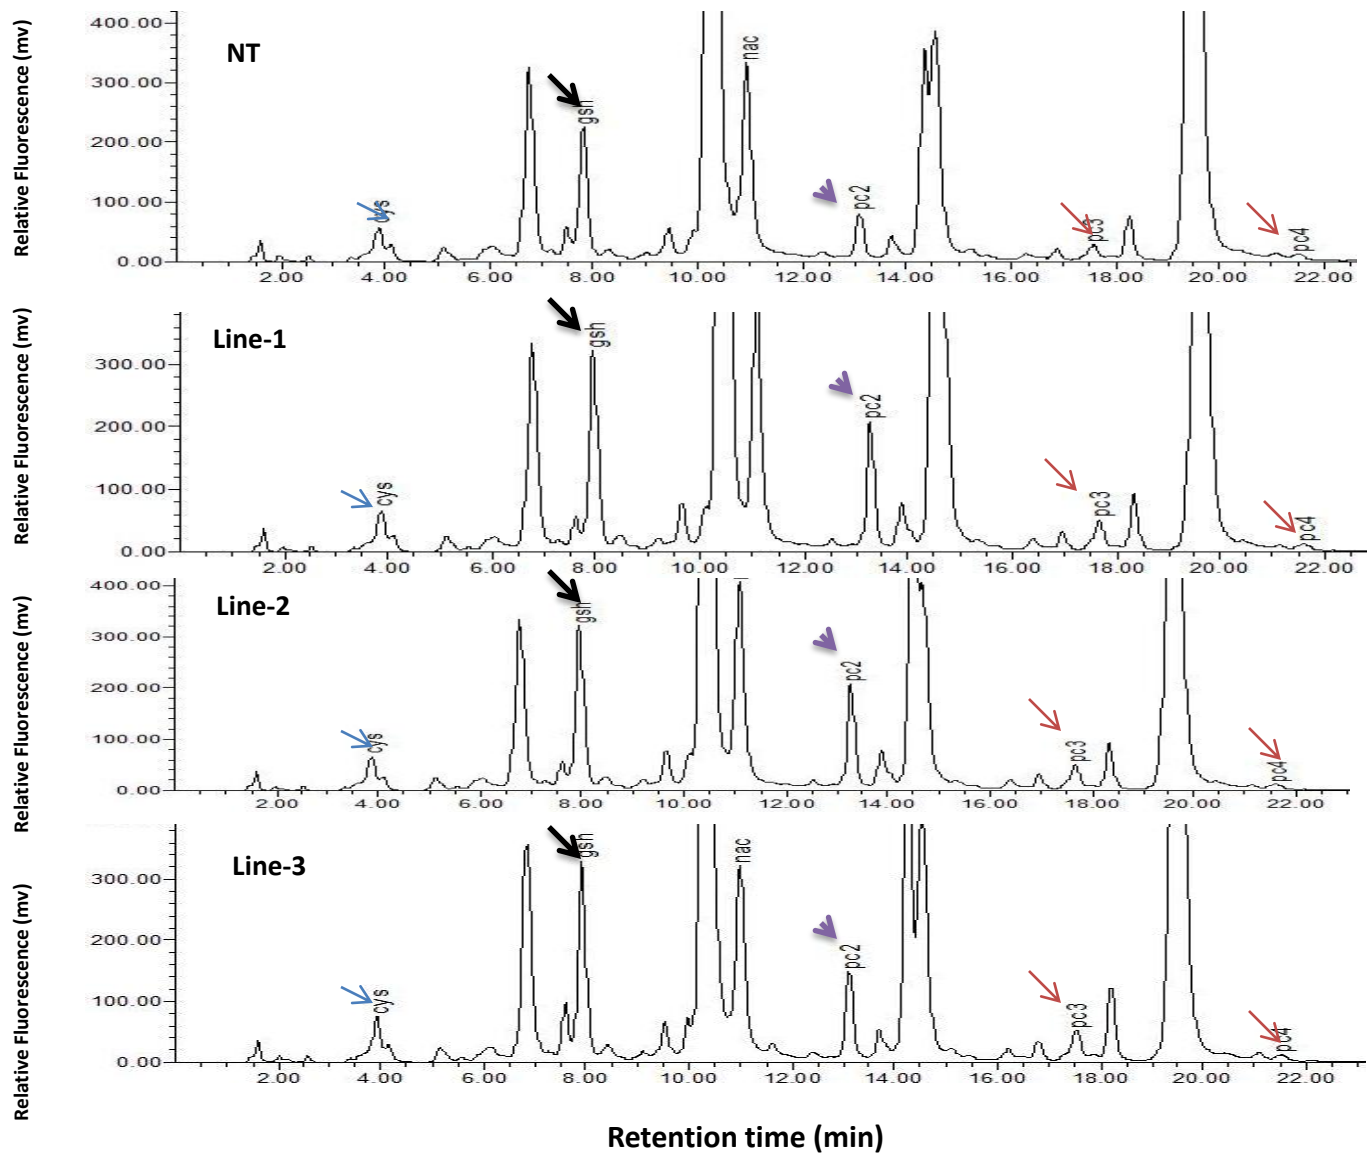

**Figure S1** Fluorescence HPLC chromatograms of the mBBr-labeled plant extracts from NT and transgenic lines. Shoot extracts of NT and *CdPCS1* expressing transgenic lines grown in the presence of 100 $\mu$ M Na<sub>2</sub>AsO<sub>4</sub> were derivatized with mBBr and separated by HPLC. Peaks corresponding to Cys, GSH, PC2, PC3 and PC4 standards are indicated in the chromatogram.

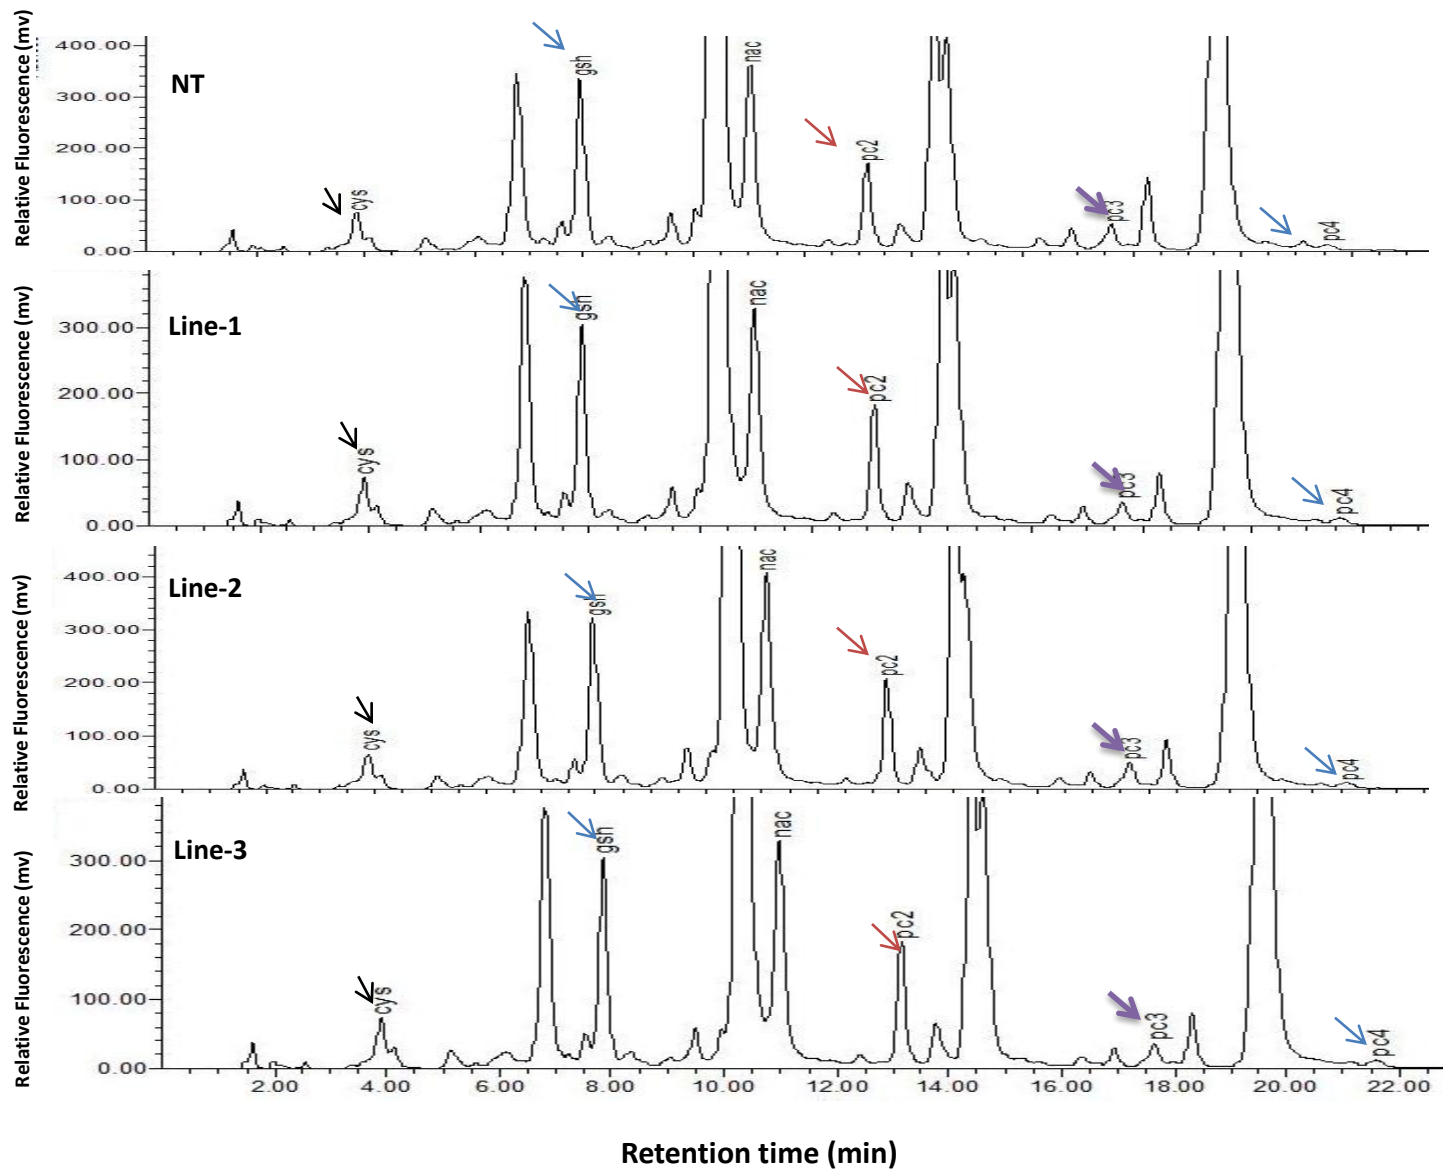

Retention time (min)

**Figure S2** Fluorescence HPLC chromatograms of the mBBr-labeled plant extracts from NT and transgenic lines. Root extracts of NT and *CdPCS1* expressing transgenic lines grown in the presence of 100 $\mu$ M Na<sub>2</sub>AsO<sub>4</sub> were derivatized with mBBr and separated by HPLC. Peaks corresponding to Cys, GSH, PC2, PC3 and PC4 standards are indicated in the chromatogram.

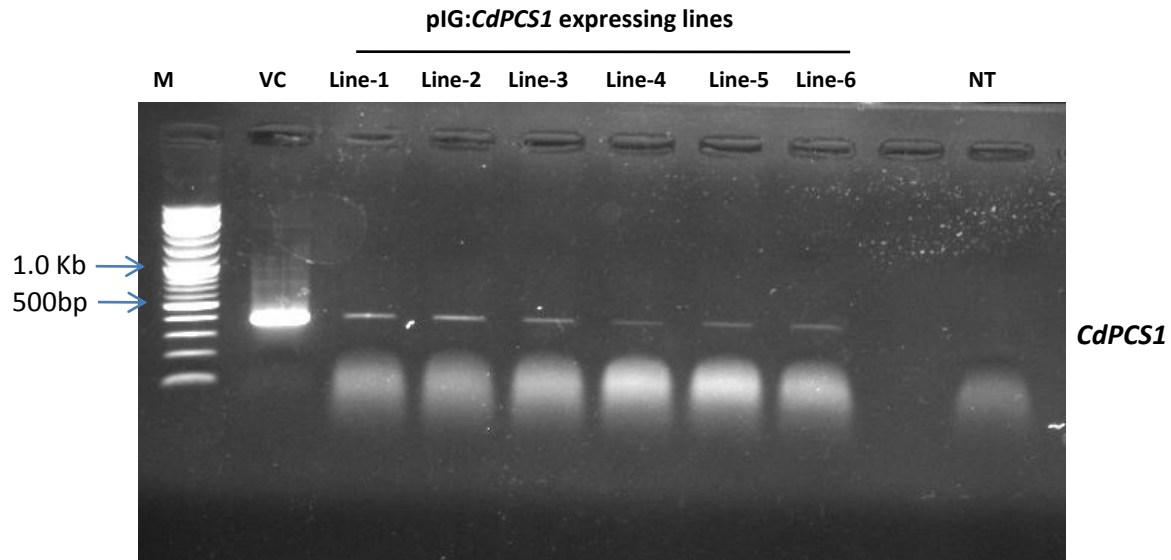

**Figure S 3.** Confirmation of the presence of *CdPCS1* in transgenic lines through genomic DNA PCR. Lane-M represent O' Range Ruler™ 100bp+500bp DNA ladder, VC represent vector control and NT represents non transgenic control. PCR amplification was carried out using gene-specific *CdPCS1*-RTF and *CdPCS1*-RTR primers.

**Table S1.** Relative accumulation of As in different tissues of transgenic lines with respect to NT

|               | <b>Grain (%)</b> | <b>Husk (%)</b> | <b>Shoot (%)</b> | <b>Root (%)</b> |
|---------------|------------------|-----------------|------------------|-----------------|
| <b>Line-1</b> | -46.07           | -55.20          | 53.18            | 213.81          |
| <b>Line-2</b> | -59.21           | -64.19          | 25.61            | 327.39          |
| <b>Line-3</b> | -48.44           | -53.32          | 16.18            | 224.16          |
